# Supplementary material for: Self-assembling oxidized silk fibroin nanofibrils with controllable fractal dimensions
Source: Royal Society of Chemistry journal article supplement (doi:10.1039/c8tb00567b), 2018-01-01
Supplement: c8tb00567b1.pdf [file c8tb00567b1.pdf]

## **Self-Assembling Oxidized Silk Fibroin Nanofibrils with Controllable Fractal Dimension**

Ke Zheng<sup>1</sup>, Juan Yu<sup>1</sup>, Wenwen Zhang<sup>1</sup>, Xun Li<sup>1</sup>, Yimin Fan<sup>1\*</sup>, and David L. Kaplan<sup>2</sup>

<sup>1</sup> Jiangsu Co-Innovation Center of Efficient Processing and Utilization of Forest Resources, Jiangsu Key Lab of Biomass-Based Green Fuel & Chemicals, College of Chemical Engineering, Nanjing Forestry University, Nanjing 210037, People's Republic of China

<sup>2</sup> Department of Biomedical Engineering, 4 Colby Street, Tufts University, Medford, Massachusetts 02155, United States

**The corresponding author:** Yimin Fan, Jiangsu Co-Innovation Center of Efficient Processing and Utilization of Forest Resources, Jiangsu Key Lab of Biomass-based Green Fuel & Chemicals, College of Chemical Engineering, Nanjing Forestry University, Nanjing 210037, People's Republic of China; phone +86 2585 42 7587; E-mail [fanyimin@njfu.edu.cn](mailto:fanyimin@njfu.edu.cn)

### **Supporting Information**

Figure S1, The titration curve of chitosan

Figure S2, Viscosity of chitosan (1 wt %, dissolving in 1% acetic acid ) solution for layer-by-layer coating

Figure S3 SEM observation for the surface of composite membranes

Figure S4, SEM observation for the cross-section of composite membranes

Figure S5, Viscosity of 0.2 wt% SF and 0.2 wt% OxSF solution

Figure S6, The mechanical properties of chitosan and SF-chitosan composite membranes

Figure S7, The ANOVA tests of hardness and modulus for OxSF-chitosan composite membranes.

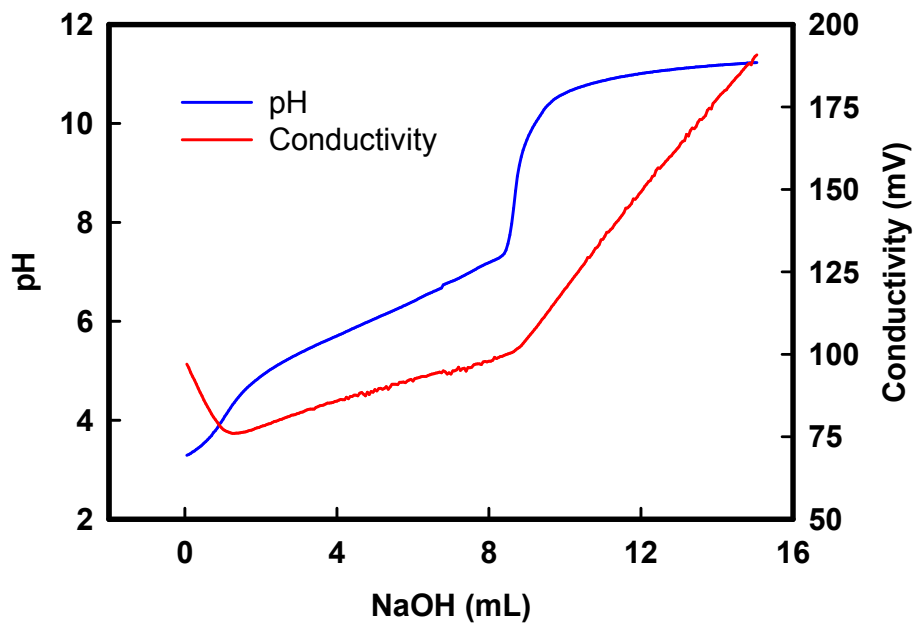

Figure S1, The titration curve of the commercial chitosan (Sigma, medium molecular weight, MSDS 448877)

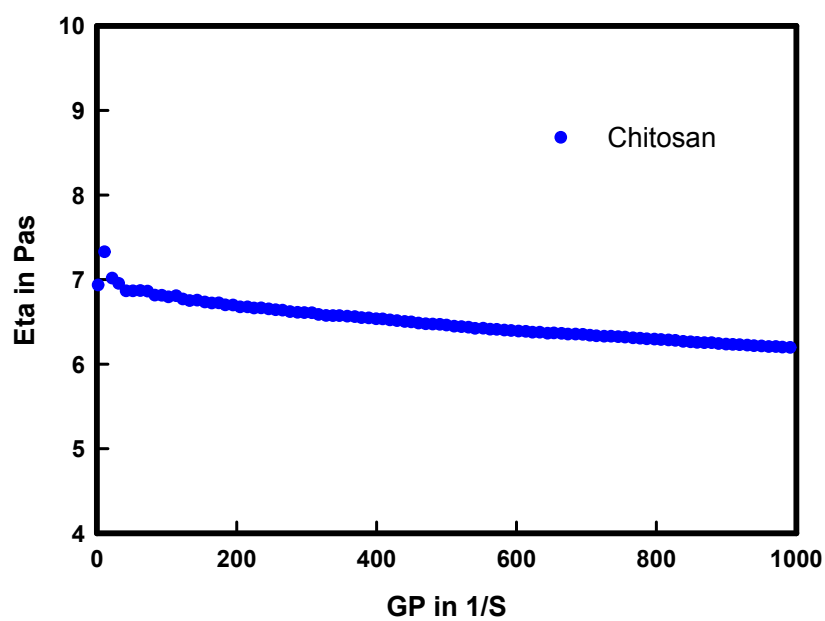

Figure S2, Viscosity of chitosan (1 wt %, dissolving in 1% acetic acid) solution for layer-by-layer coating

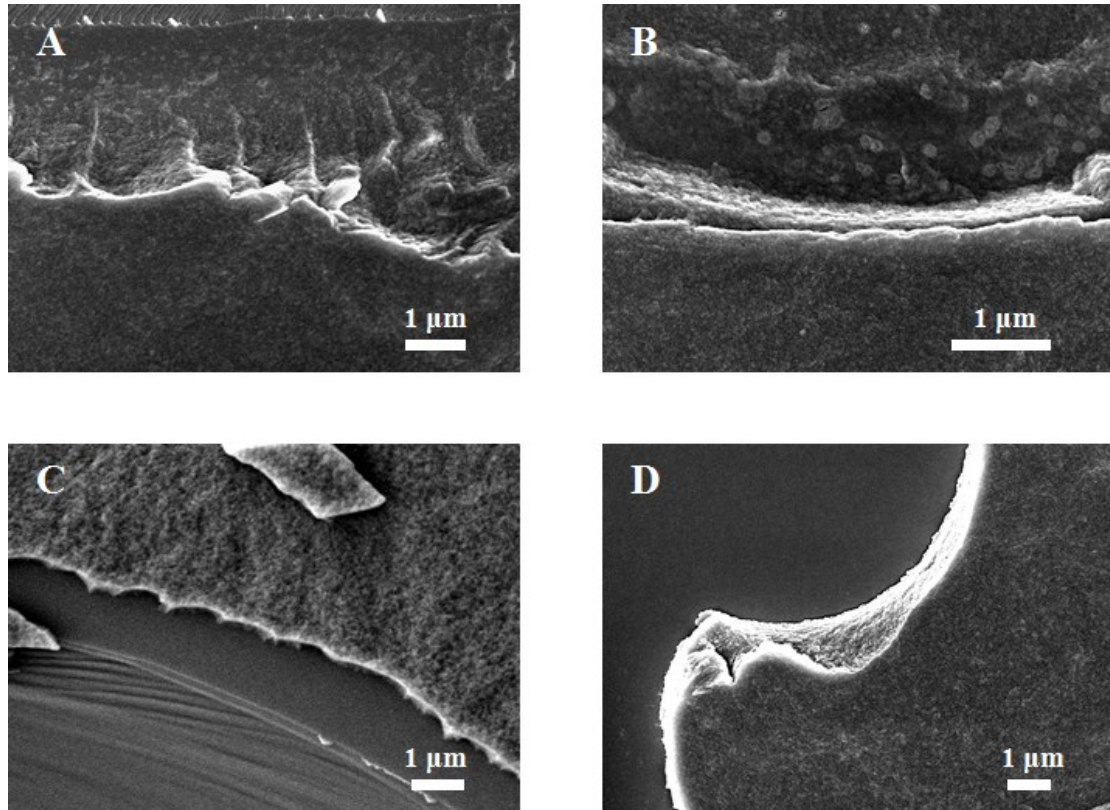

Figure S3. The SEM observation for the surface of (A) chitosan membrane, (B) SF-chitosan membrane, (C) 0.5 mM OxSF-chitosan membrane, and (D) 2 mM OxSF-chitosan membrane, respectively.

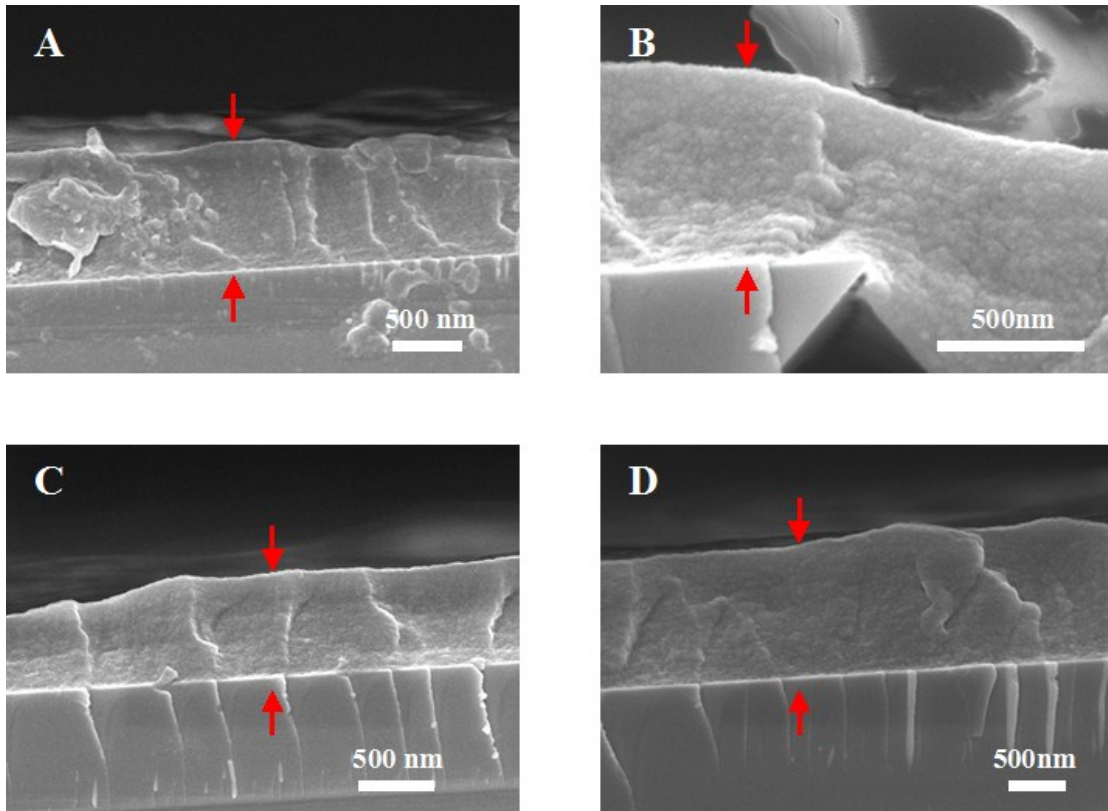

Figure S4. The SEM observation for the cross-section of (A) chitosan membrane, (B) SF-chitosan membrane, (C) 0.5 mM OxSF-chitosan membrane, and (D) 2 mM OxSF-chitosan membrane, respectively. The thickness of the as prepared composite films were both over 600 nm (red arrows).

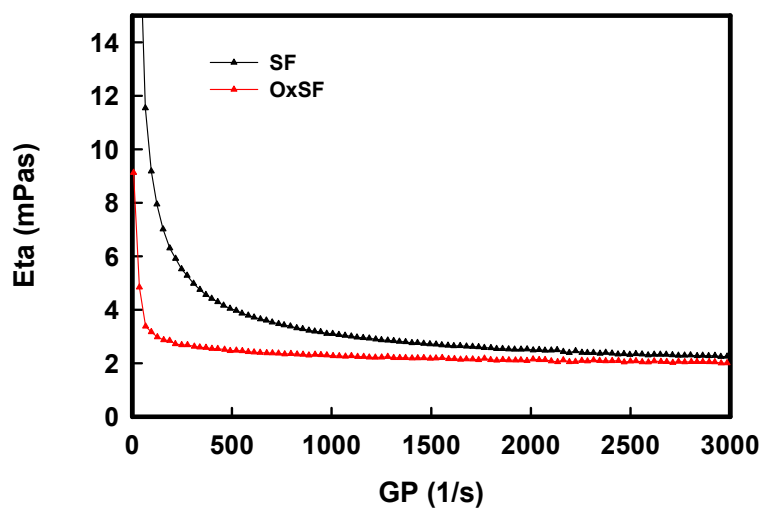

Figure S5. Viscosity of 0.2 wt% SF and 0.2 wt% OxSF solution.

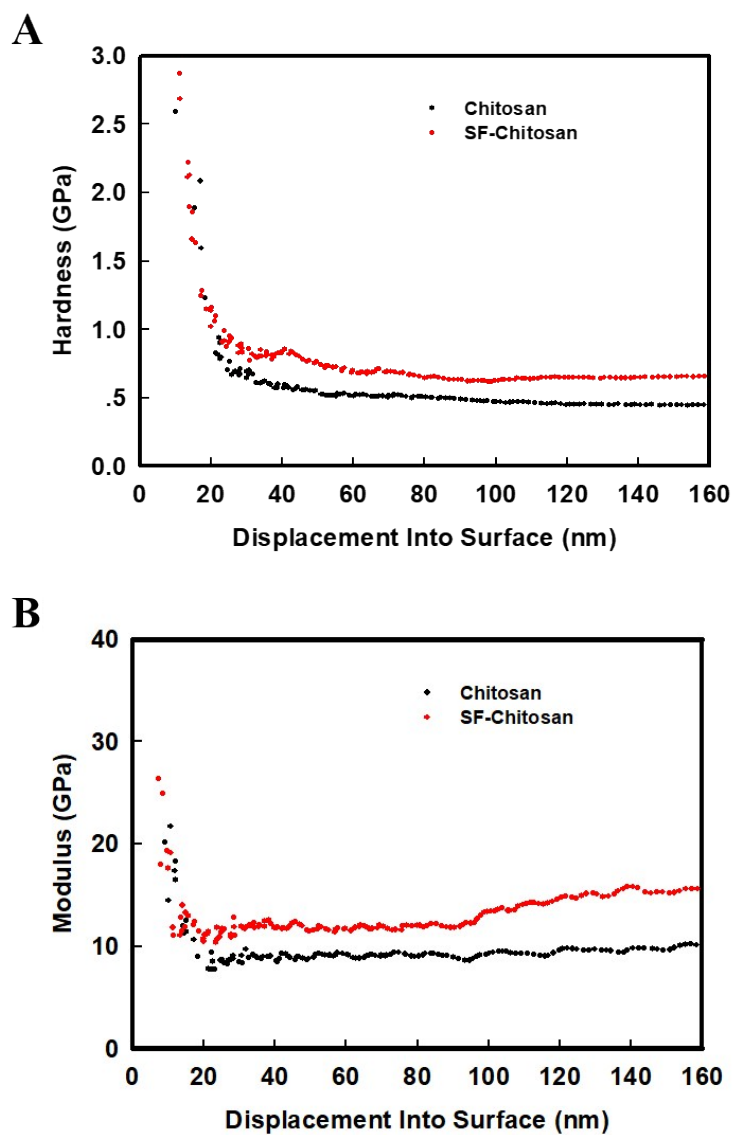

Figure S6. The (A) hardness and (B) modulus of chitosan and SF-chitosan composite membranes

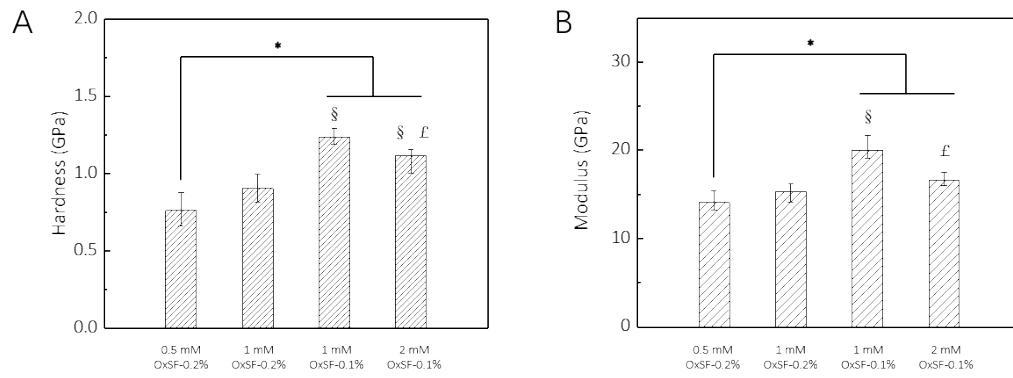

Figure S7, The ANOVA tests of hardness and modulus for OxSF-chitosan composite membranes. Data represent mean SD (n = 5), asterisk (\*) means  $p \leq 0.05$ , symbol (§) denotes the p value of data  $\leq 0.05$  relative to 1 mM OxSF-0.2%, symbol (£) denotes the p value of data  $\leq 0.05$  relative to 1 mM OxSF-0.1%.
